# Supplementary material
Source: PubMed Central journal article supplement (PMC3311710)
Supplement: NIHMS355766-supplement-1_si_001.pdf [file NIHMS355766-supplement-1_si_001.pdf]

# Synergistic TRAIL sensitizers from *Barleria alluaudii* and *Diospyros maritima*

Emily L. Whitson, Han Sun, Cheryl L. Thomas, Curtis J. Henrich, Thomas J. Sayers, James B. McMahon, Christian Griesinger, and Tawnya C. McKee

1.  $^1\text{H}$  NMR spectrum of 2,3-epoxy-2,3-dihydrolapachol (**1**) in  $\text{CDCl}_3$
2.  $^{13}\text{C}$  NMR spectrum of 2,3-epoxy-2,3-dihydrolapachol (**1**) in  $\text{CDCl}_3$
3.  $^1\text{H}$  NMR spectrum of 2,3-epoxy-2,3-dihydro-8-hydroxylapachol (**2**) in  $\text{CDCl}_3$
4.  $^{13}\text{C}$  NMR spectrum of 2,3-epoxy-2,3-dihydro-8-hydroxylapachol (**2**) in  $\text{CDCl}_3$
5. Chiral HPLC analysis of **1**
- 6-27 Gaussian keywords, calculated excitation energies, oscillator strengths, and rotational strengths for **1-2**, important dihedral angles of conformers **1a-1f** and **2a-2f**, conformational analysis of **1**, calculated ORD values for **1-2**, and coordinates of conformers **1a-1f** and **2a-2f**.

# $^1\text{H}$ NMR spectrum of 2,3-epoxy-2,3-dihydrolapachol (**1**) in $\text{CDCl}_3$

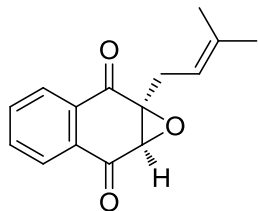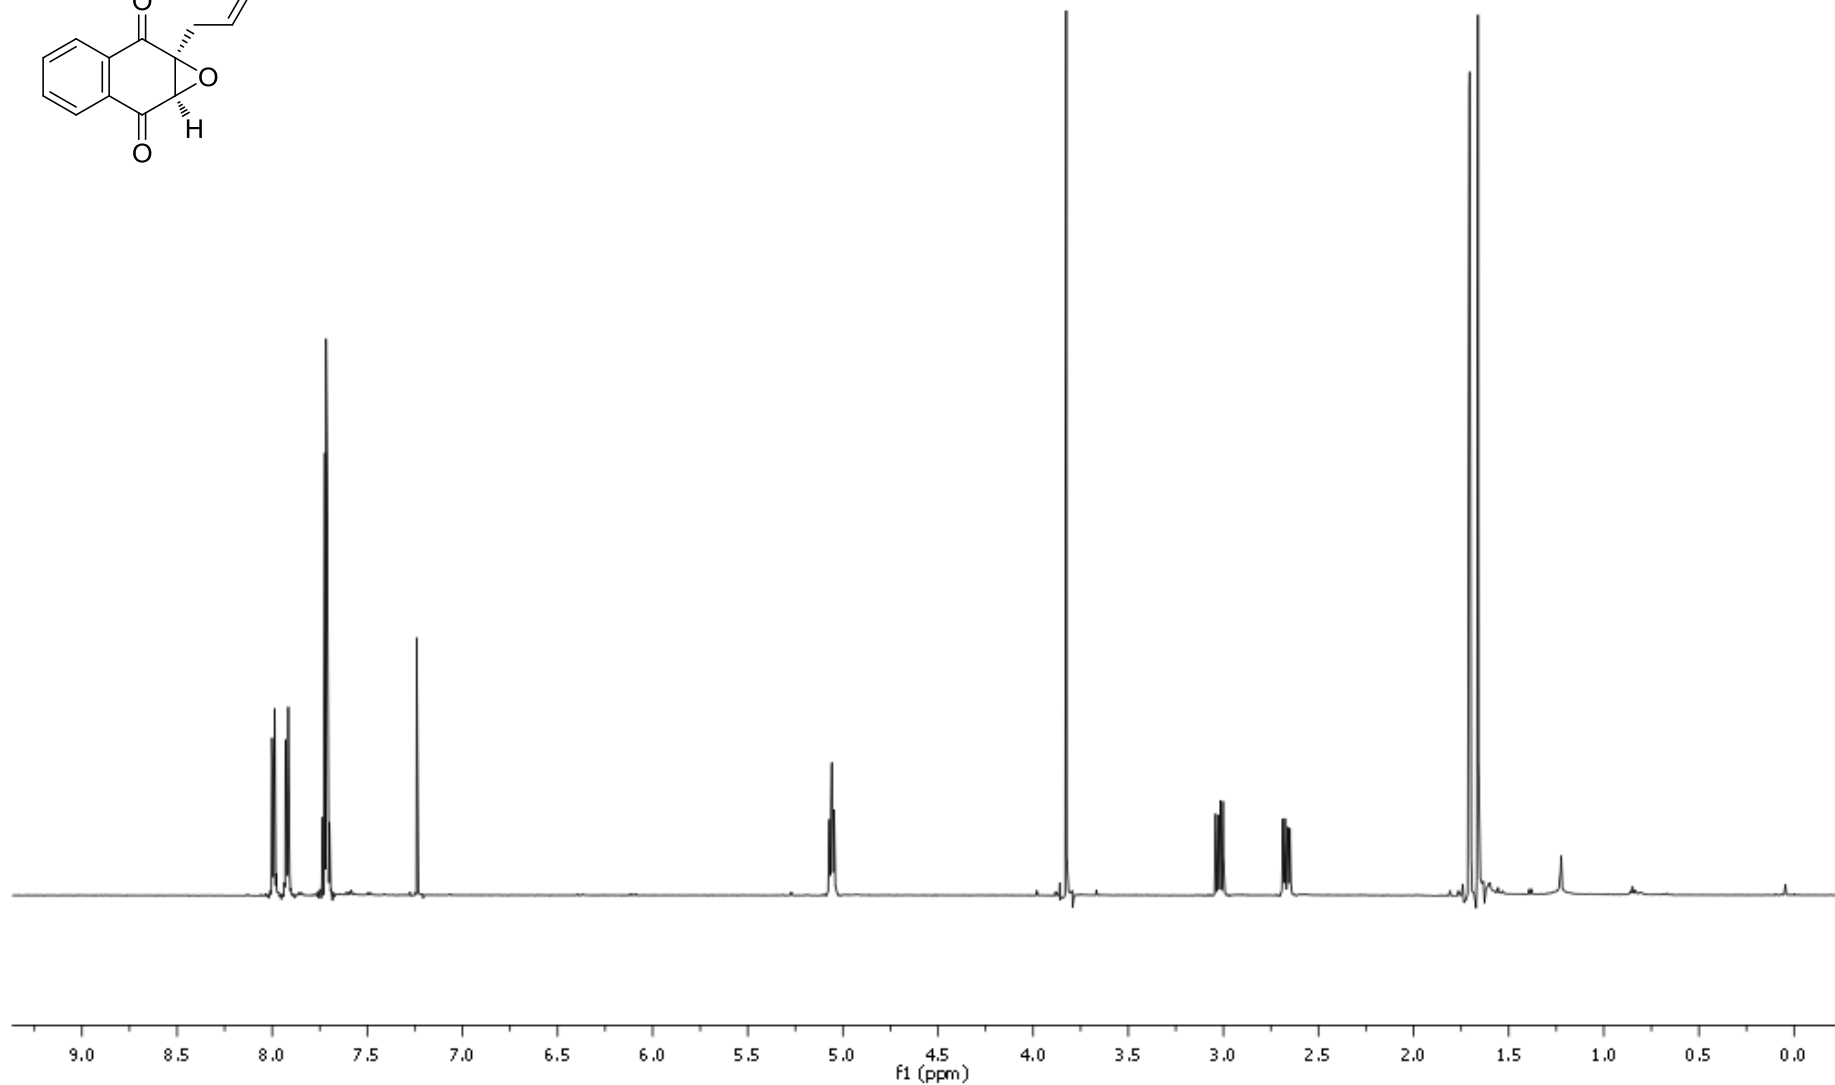

# $^{13}\text{C}$ NMR spectrum of 2,3-epoxy-2,3-dihydrolapachol (**1**) in $\text{CDCl}_3$

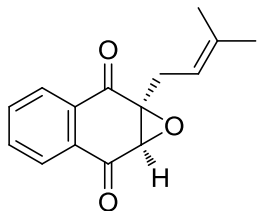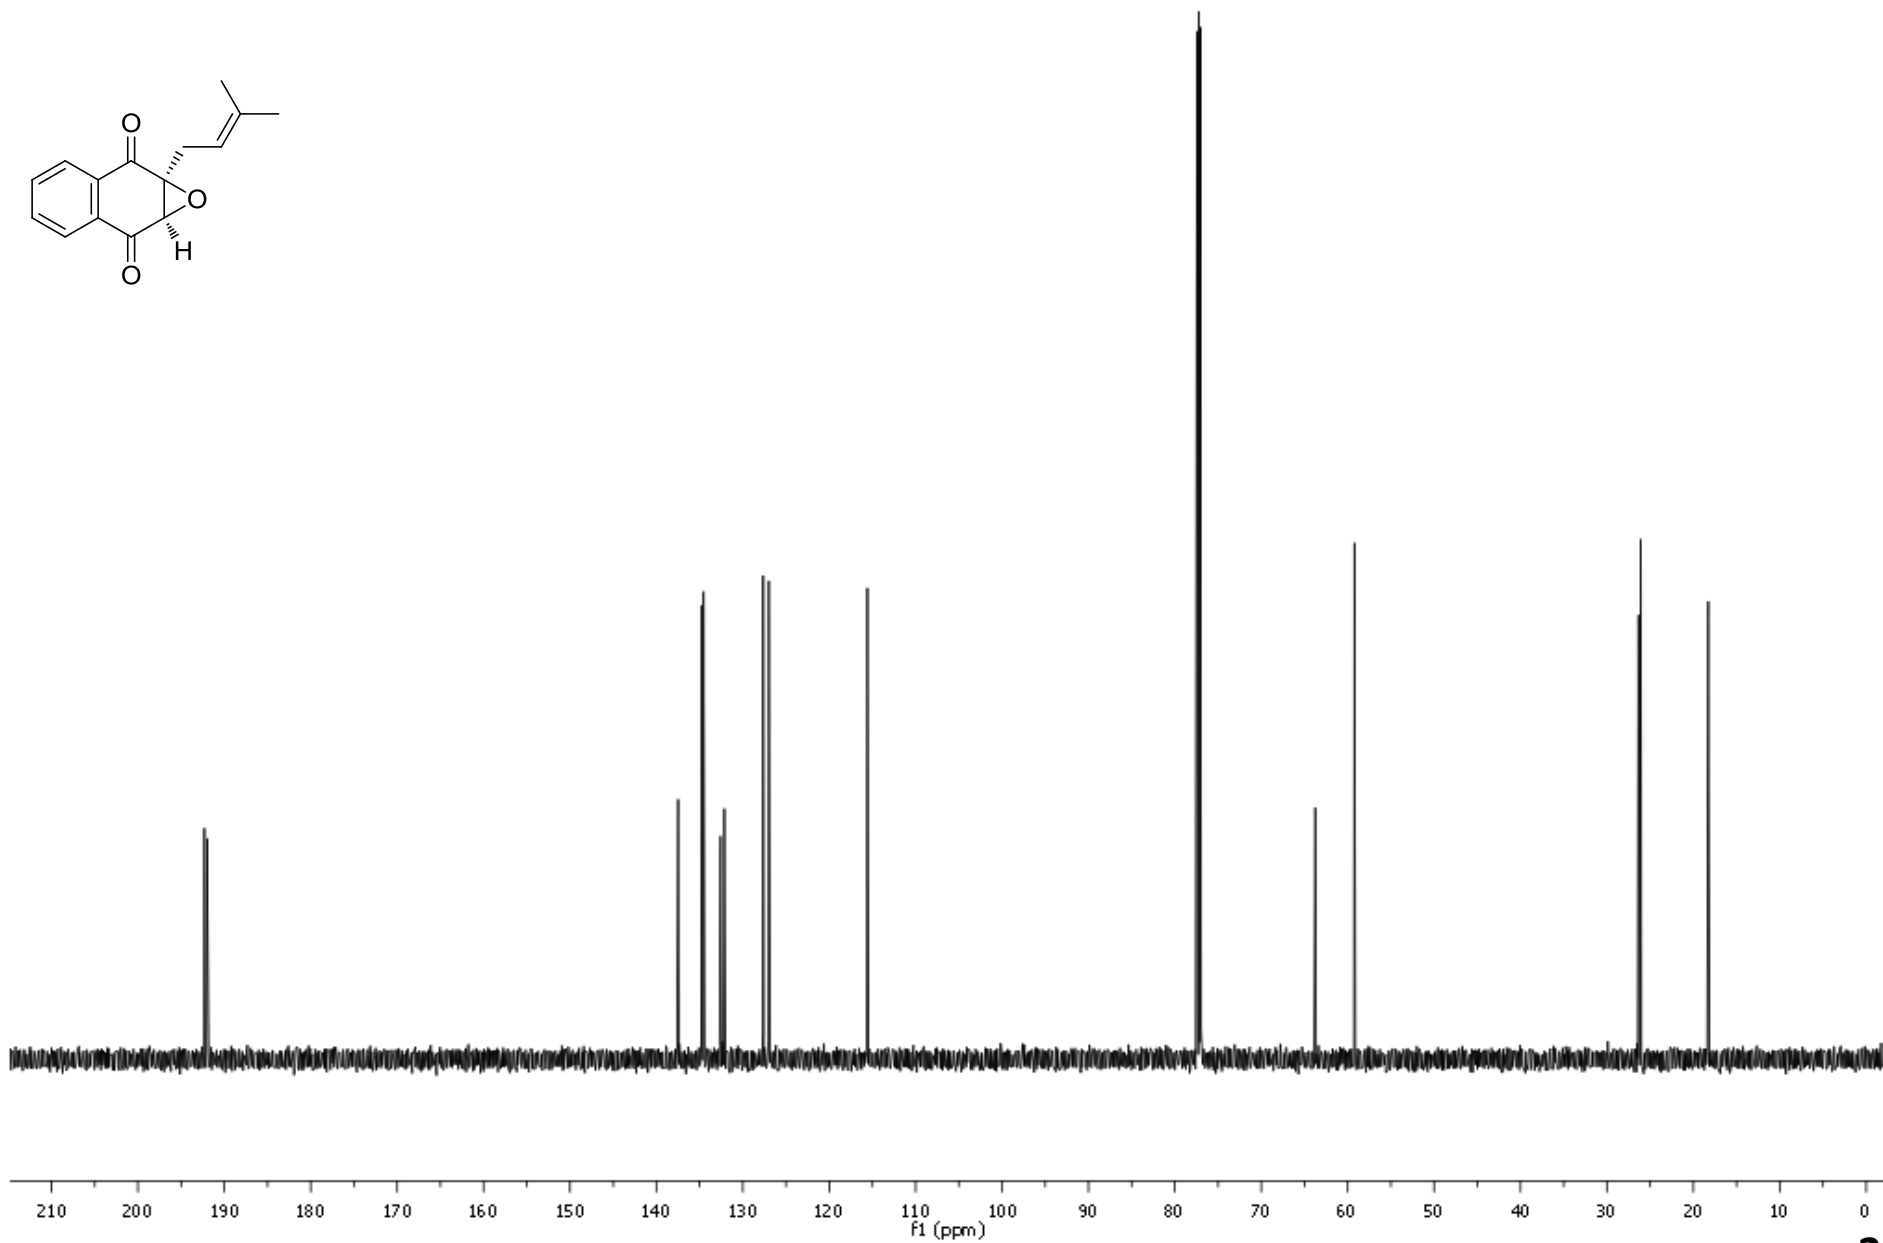

$^1\text{H}$  NMR spectrum of 2,3-epoxy-2,3-dihydro-8-hydroxylapachol (**2**) in  $\text{CDCl}_3$

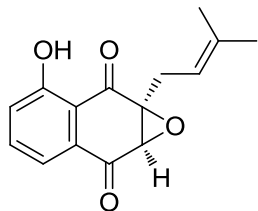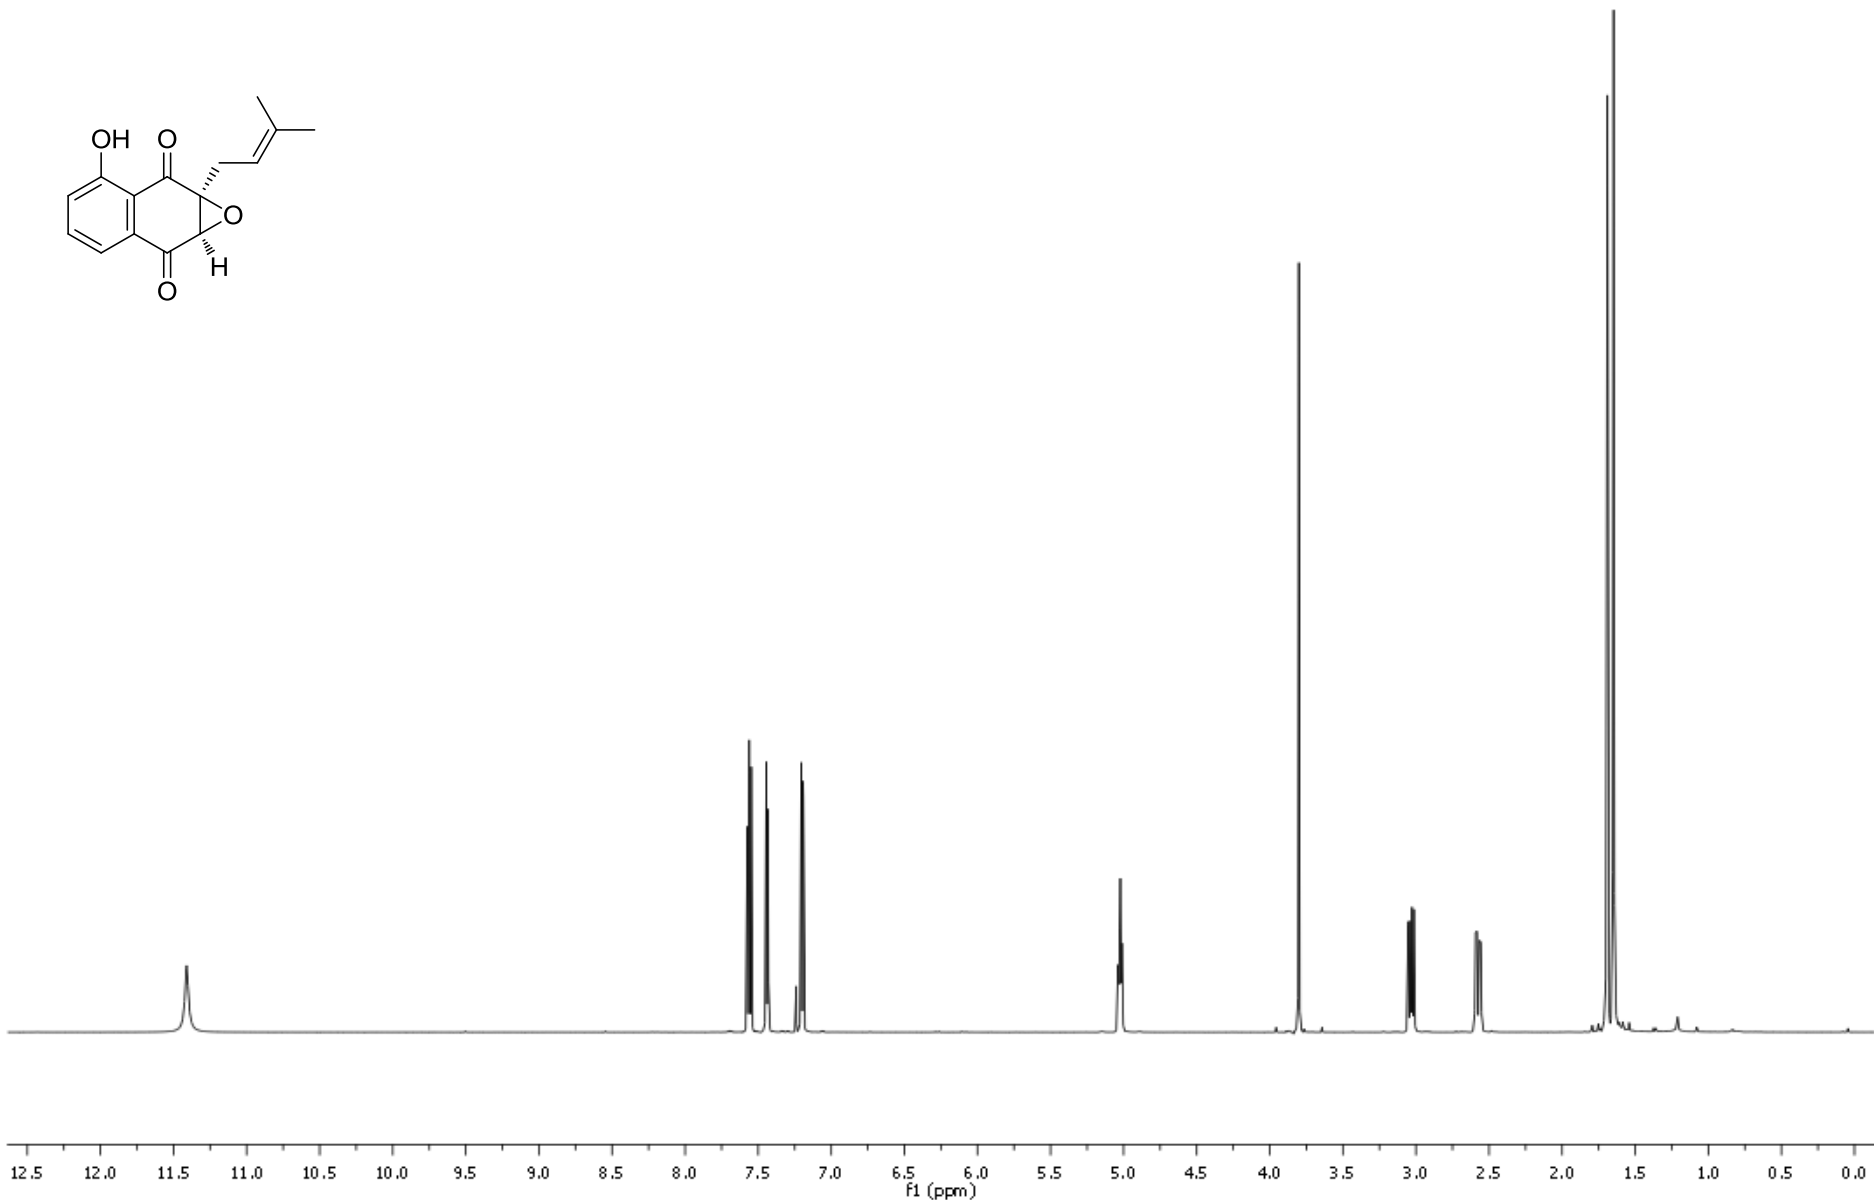

$^{13}\text{C}$  NMR spectrum of 2,3-epoxy-2,3-dihydro-8-hydroxylapachol (**2**) in  $\text{CDCl}_3$

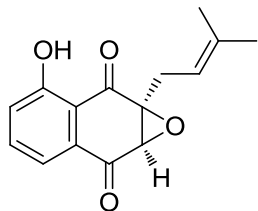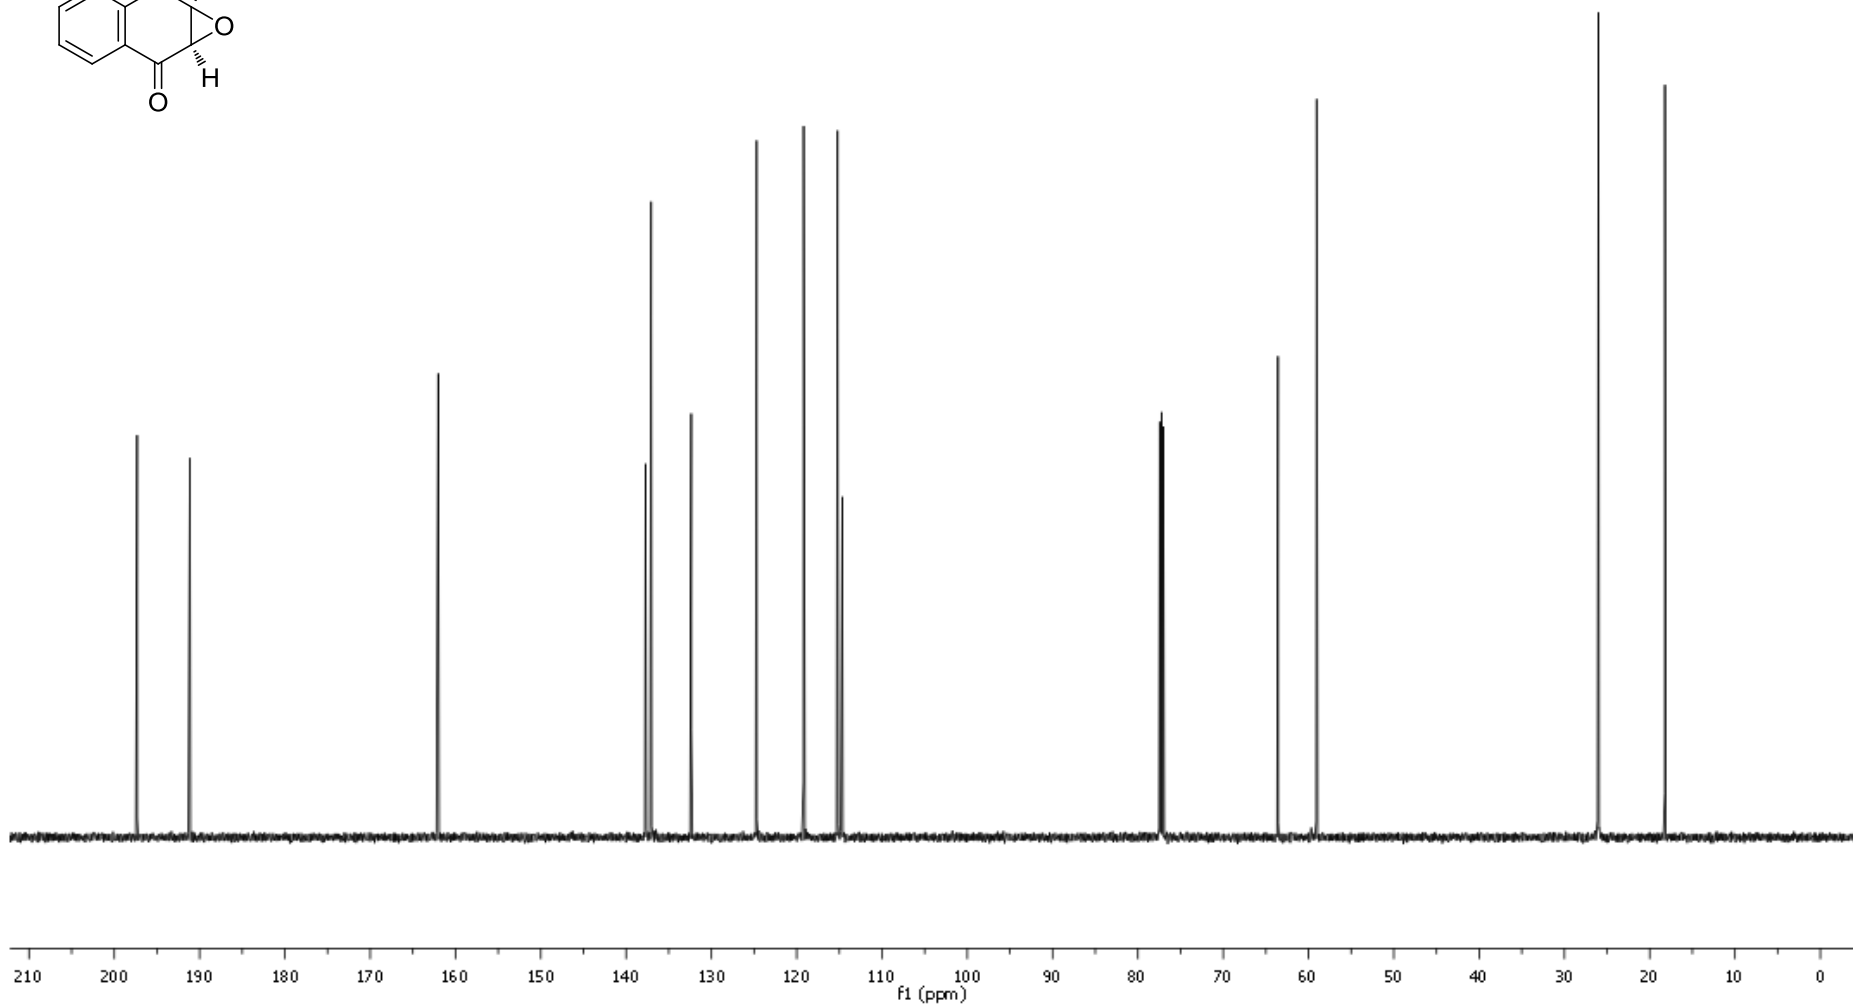

# Chiral HPLC analysis of **1**

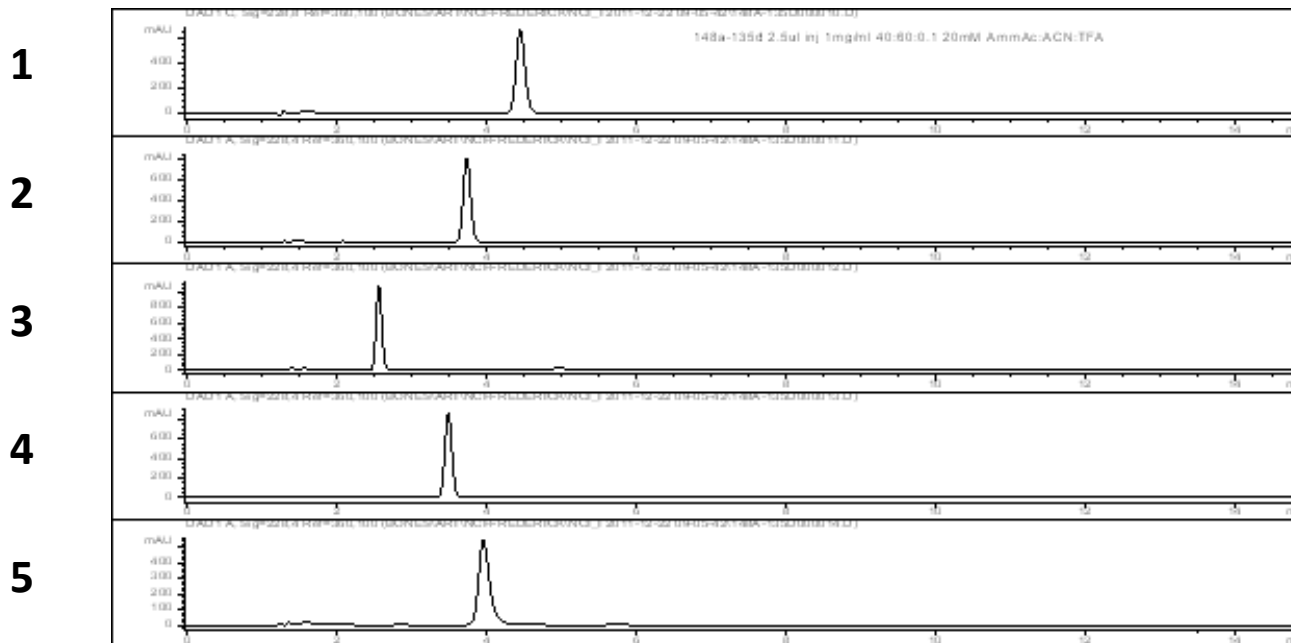

| Columns                                      | Conditions                                                            |
|----------------------------------------------|-----------------------------------------------------------------------|
| 1, Lux Cellulose-1 (5 $\mu$ m, 150 x 4.6 mm) | (40:60:0.1) 20 mM NH <sub>4</sub> OAc/CH <sub>3</sub> CN/TFA          |
| 2, Lux Cellulose-2 (5 $\mu$ m, 150 x 4.6 mm) | (40:60:0.1) 20 mM NH <sub>4</sub> OAc/CH <sub>3</sub> CN/TFA          |
| 3, Lux Cellulose-3 (5 $\mu$ m, 150 x 4.6 mm) | (40:60:0.1) 20 mM NH <sub>4</sub> OAc/CH <sub>3</sub> CN/TFA          |
| 4, Lux Cellulose-4 (5 $\mu$ m, 150 x 4.6 mm) | (40:60:0.1) 20 mM NH <sub>4</sub> OAc/CH <sub>3</sub> CN/TFA          |
| 5, Lux Amylose-2 (5 $\mu$ m, 150 x 4.6 mm)   | (40:60:0.1) 20 mM NH <sub>4</sub> OAc/CH <sub>3</sub> CN/TFA          |
| (S,S)-WHELK-02 (10 $\mu$ m, 250 x 4.6 mm)    | (50:50:0.1) CH <sub>3</sub> CN/H <sub>2</sub> O/AcOH (data not shown) |

The Gaussian09 keywords for calculating ECD are:

```
# td=(nstates=50) rb3lyp/6-31g(d) scrf=(iefpcm,solvent=methanol)
```

**Table S1.** Excited energy, wavelength, oscillator strength, rotatory strength in velocity form and rotatory strength in length form of **2a-2f**.<sup>a</sup>

| Conformer | $\Delta E$ (eV) | $\lambda$ (nm) | $f$    | $R^{vel,b}$ | $R^{len,b}$ |
|-----------|-----------------|----------------|--------|-------------|-------------|
| <b>2a</b> | 2.99            | 414.1          | 0.001  | -5.7        | -7.7        |
|           | 3.38            | 368.2          | 0.040  | -31.2       | -29.9       |
|           | 3.47            | 357.2          | 0.091  | 2.2         | 2.9         |
|           | 3.75            | 330.8          | 0.004  | 26.1        | 24.9        |
|           | 4.26            | 290.8          | 0.012  | -3.9        | -7.7        |
|           | 4.32            | 287.1          | 0.039  | 3.3         | 3.9         |
|           | 4.60            | 269.2          | 0.019  | 12.5        | 13.4        |
|           | 4.78            | 259.3          | 0.013  | -29.0       | -30.5       |
|           | 5.04            | 246.2          | 0.036  | 34.3        | 39.9        |
|           | 5.20            | 238.3          | 0.069  | -20.0       | -21.4       |
|           | 5.35            | 231.7          | 0.038  | 15.5        | 16.0        |
|           | 5.51            | 225.2          | 0.298  | -0.8        | -1.3        |
|           | 5.91            | 209.8          | 0.061  | -8.5        | -10.0       |
|           | 5.96            | 208.1          | 0.005  | -0.4        | -0.4        |
| 6.08      | 203.9           | 0.049          | -10.7  | -10.6       |             |
| 6.13      | 202.3           | 0.108          | 10.2   | 8.6         |             |
| <b>2b</b> | 3.11            | 399.3          | 0.0003 | 2.2         | 1.3         |
|           | 3.36            | 369.0          | 0.024  | -31.6       | -30.3       |
|           | 3.47            | 357.8          | 0.109  | 13.7        | 14.5        |
|           | 3.71            | 334.1          | 0.001  | 14.9        | 13.9        |
|           | 4.30            | 288.4          | 0.038  | 10.2        | 8.0         |
|           | 4.36            | 284.2          | 0.020  | -9.6        | -9.3        |
|           | 4.58            | 270.5          | 0.015  | 14.5        | 13.4        |
|           | 4.75            | 260.9          | 0.015  | -27.1       | -28.0       |
|           | 5.02            | 247.0          | 0.035  | 34.7        | 39.6        |
|           | 5.17            | 239.7          | 0.056  | -22.6       | -23.8       |
|           | 5.37            | 230.9          | 0.047  | 0.8         | 1.0         |
|           | 5.51            | 225.2          | 0.309  | 4.6         | 4.4         |
|           | 5.91            | 210.0          | 0.012  | 5.7         | 6.0         |
|           | 6.06            | 204.6          | 0.075  | 23.3        | 24.2        |
| 6.09      | 203.6           | 0.040          | 0.7    | -0.5        |             |
| 6.12      | 202.5           | 0.041          | 5.7    | 5.6         |             |

|           |       |       |        |       |       |
|-----------|-------|-------|--------|-------|-------|
| <b>2c</b> | 3.17  | 390.6 | 0.003  | -0.3  | -1.0  |
|           | 3.35  | 369.6 | 0.024  | -34.2 | -32.4 |
|           | 3.47  | 357.3 | 0.115  | 3.2   | 3.5   |
|           | 3.74  | 331.8 | 0.003  | 21.1  | 19.5  |
|           | 4.30  | 288.3 | 0.044  | 0.1   | -3.0  |
|           | 4.43  | 280.0 | 0.003  | 2.4   | 3.4   |
|           | 4.59  | 270.0 | 0.015  | 12.2  | 11.7  |
|           | 4.76  | 260.7 | 0.018  | -31.7 | -32.8 |
|           | 5.02  | 247.1 | 0.036  | 32.3  | 38.5  |
|           | 5.19  | 239.0 | 0.056  | -20.4 | -22.2 |
|           | 5.38  | 230.3 | 0.048  | 11.5  | 11.9  |
|           | 5.52  | 224.8 | 0.331  | -7.8  | -8.4  |
|           | 5.89  | 210.5 | 0.007  | 8.0   | 8.0   |
|           | 6.11  | 202.9 | 0.039  | -13.7 | -15.0 |
|           | 6.13  | 202.2 | 0.080  | 5.9   | 5.2   |
| 6.16      | 201.4 | 0.021 | -2.8   | -2.9  |       |
| <b>2d</b> | 3.12  | 397.8 | 0.0002 | -1.5  | -2.5  |
|           | 3.35  | 369.7 | 0.026  | -33.7 | -32.3 |
|           | 3.46  | 358.1 | 0.112  | 19.5  | 20.2  |
|           | 3.71  | 334.6 | 0.002  | 15.9  | 15.1  |
|           | 4.30  | 288.1 | 0.045  | 9.4   | 7.5   |
|           | 4.37  | 283.8 | 0.029  | -3.6  | -2.9  |
|           | 4.58  | 270.8 | 0.017  | 14.3  | 13.4  |
|           | 4.74  | 261.6 | 0.016  | -28.2 | -29.0 |
|           | 5.02  | 247.0 | 0.024  | 26.9  | 31.9  |
|           | 5.18  | 239.4 | 0.036  | -18.3 | -19.4 |
|           | 5.39  | 230.1 | 0.061  | 3.4   | 3.6   |
|           | 5.50  | 225.3 | 0.327  | 32.8  | 34.6  |
|           | 5.84  | 212.4 | 0.005  | 1.3   | 1.3   |
|           | 6.08  | 203.9 | 0.009  | -18.2 | -18.9 |
|           | 6.09  | 203.4 | 0.070  | 38.3  | 39.2  |
| 6.12      | 202.5 | 0.074 | 12.5   | 12.5  |       |
| <b>2e</b> | 3.16  | 392.4 | 0.002  | 0.5   | -0.6  |
|           | 3.36  | 369.5 | 0.028  | -35.3 | -33.6 |
|           | 3.47  | 357.3 | 0.113  | 11.4  | 11.9  |
|           | 3.74  | 331.6 | 0.003  | 19.4  | 18.3  |
|           | 4.31  | 287.8 | 0.046  | -8.9  | -12.2 |
|           | 4.41  | 281.2 | 0.005  | 3.2   | 3.9   |
|           | 4.59  | 270.3 | 0.017  | 17.5  | 17.2  |
|           | 4.75  | 261.0 | 0.017  | -30.7 | -31.6 |
|           | 5.02  | 247.1 | 0.031  | 27.4  | 32.8  |



|           |      |       |       |       |       |
|-----------|------|-------|-------|-------|-------|
|           | 5.19 | 238.9 | 0.047 | -17.3 | -18.6 |
|           | 5.47 | 226.7 | 0.053 | -7.0  | -7.5  |
|           | 5.51 | 224.9 | 0.340 | 13.7  | 14.6  |
|           | 5.78 | 214.5 | 0.002 | -1.6  | -1.8  |
|           | 6.09 | 230.4 | 0.057 | 5.6   | 5.3   |
|           | 6.13 | 202.3 | 0,956 | 7.1   | 7.2   |
|           | 6.15 | 201.5 | 0.012 | -5.5  | -6.3  |
| <b>2f</b> | 3.06 | 405.7 | 0.002 | -8.7  | -10.1 |
|           | 3.36 | 368.5 | 0.039 | -34.2 | -32.6 |
|           | 3.46 | 357.9 | 0.099 | -3.8  | -3.2  |
|           | 3.69 | 336.1 | 0.003 | 26.8  | 24.4  |
|           | 4.29 | 288.9 | 0.032 | -5.6  | -9.8  |
|           | 4.34 | 285.7 | 0.024 | 3.8   | 5.1   |
|           | 4.60 | 269.4 | 0.020 | 13.4  | 14.0  |
|           | 4.77 | 259.9 | 0.014 | -32.2 | -33.8 |
|           | 4.99 | 248.6 | 0.028 | 26.5  | 32.1  |
|           | 5.17 | 239.9 | 0.072 | -8.5  | -9.4  |
|           | 5.36 | 231.2 | 0.029 | 10.1  | 10.3  |
|           | 5.51 | 225.2 | 0.319 | -33.5 | -35.8 |
|           | 5.96 | 208.0 | 0.025 | 2.4   | 1.9   |
|           | 5.99 | 207.0 | 0.037 | -25.8 | -27.3 |
|           | 6.09 | 203.6 | 0.018 | -6.0  | -5.9  |
|           | 6.13 | 202.3 | 0.120 | 4.1   | 2.4   |

<sup>a</sup> All calculations were performed at the B3LYP/6-31G(d) level using the IEFPCM solvent continuum model with methanol as the solvent. <sup>b</sup> 10<sup>-40</sup> cgs.

**Table S2.** Important dihedral angles (deg) of optimized predominant conformers **2a-2f** with DFT at the B3LYP/6-31G(d) using the IEFPCM solvent continuum model with methanol as the solvent.

|                | <b>2a</b> | <b>2b</b> | <b>2c</b> | <b>2d</b> | <b>2e</b> | <b>2f</b> |
|----------------|-----------|-----------|-----------|-----------|-----------|-----------|
| C3-C2-C1'-C2'  | 126       | -82       | 17        | -89       | 30        | 133       |
| C2-C1'-C2'-C3' | 126       | -118      | 94        | 115       | -120      | -101      |

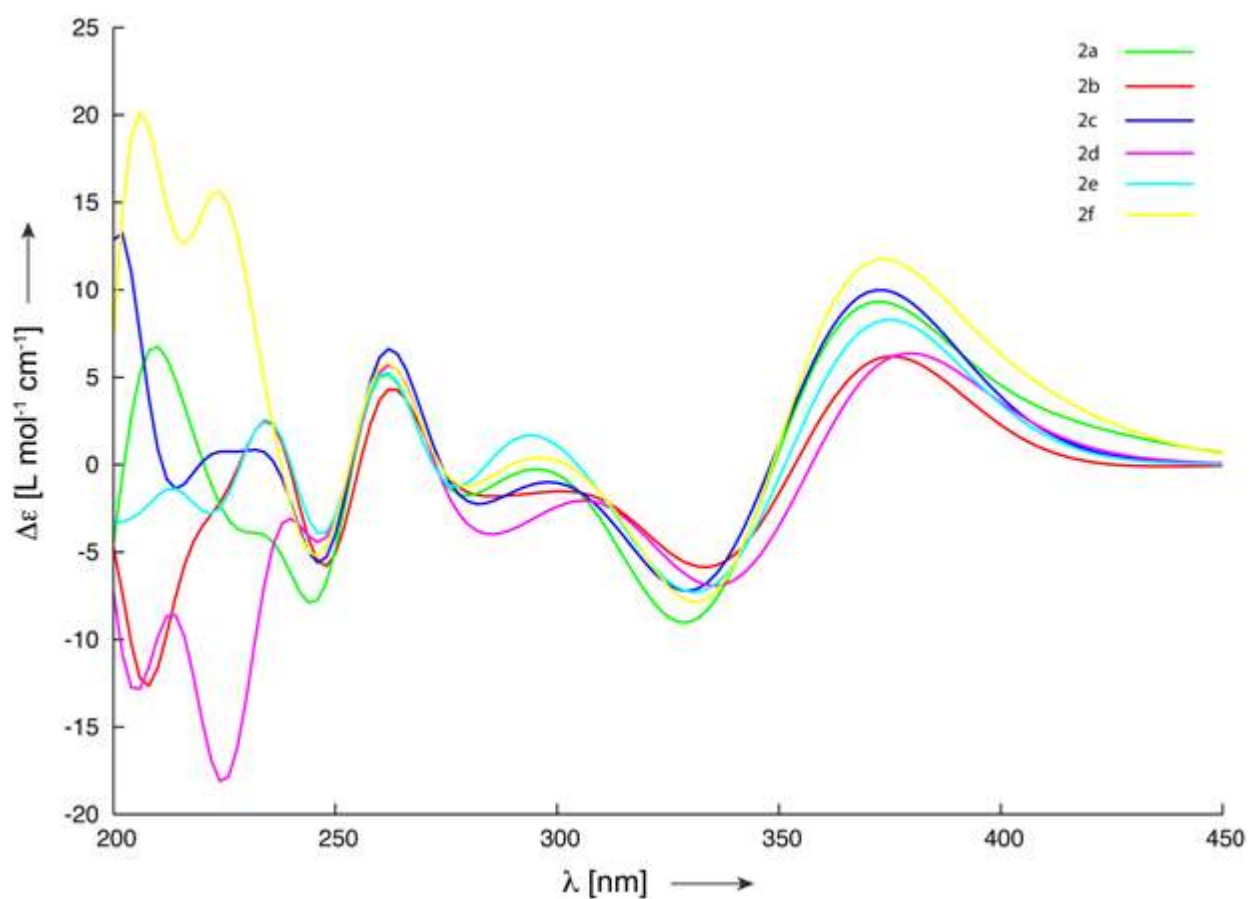

**Figure S1.** Comparison of the computed ECD spectra for the six energy lowest conformers with a 2*S*,3*R* configuration. The calculations were performed with DFT at the B3LYP/6-31G(d) level using the IEFPCM solvent continuum model with methanol as the solvent.

**Table S3.** Calculated ORD values for the six lowest energy conformers of (2*S*,3*R*)-**2** at three different wavelengths and their conformational averages compared to experimental values.

| Conformer              | Population | [ $\alpha$ ]               |                            |                            |
|------------------------|------------|----------------------------|----------------------------|----------------------------|
|                        |            | $\lambda = 546 \text{ nm}$ | $\lambda = 578 \text{ nm}$ | $\lambda = 589 \text{ nm}$ |
| <b>2a</b>              | 6.4        | +225.0                     | +136.3                     | +112.7                     |
| <b>2b</b>              | 26.2       | +246.5                     | +202.8                     | +189.5                     |
| <b>2c</b>              | 15.4       | +276.0                     | +205.9                     | +185.8                     |
| <b>2d</b>              | 10.5       | -215.5                     | -210.4                     | -206.5                     |
| <b>2e</b>              | 29.3       | +314.5                     | +246.1                     | +225.9                     |
| <b>2f</b>              | 12.2       | +873.2                     | +690.4                     | +636.3                     |
| Conformational average |            | +297.5                     | +227.7                     | +207.5                     |
| Experimental           |            | +132.5                     | +103.6                     | +92.8                      |

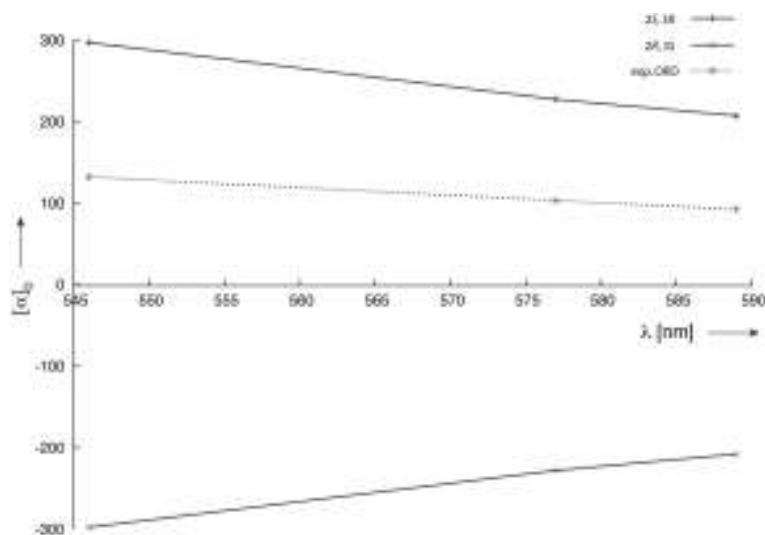

**Figure S2.** Comparison of experimental ORD values with those calculated for the two possible enantiomers (2*S*,3*R* and 2*R*,3*S*) of **2**. The calculations were performed with DFT at the B3LYP/6-31G(d) level using the IEFPCM solvent continuum model with methanol as the solvent. The calculated ORD values are weighted based on the Gibbs free energy.

Coordinates of conformers (**2a-2f**):

Conformer **2a**

|    |     |         |         |         |   |
|----|-----|---------|---------|---------|---|
| 1  | C1  | 3.6836  | -0.3455 | 0.2323  | C |
| 2  | C2  | 2.3266  | -0.5430 | 0.0083  | C |
| 3  | C3  | 1.8286  | -1.9291 | -0.2065 | C |
| 4  | O4  | 2.5688  | -2.8705 | -0.4560 | O |
| 5  | C5  | 0.3476  | -2.1465 | -0.0939 | C |
| 6  | C6  | -0.6002 | -1.0029 | -0.1652 | C |
| 7  | C7  | -0.0027 | 0.3810  | -0.3167 | C |
| 8  | O8  | -0.7449 | 1.3307  | -0.6020 | O |
| 9  | C9  | 1.4357  | 0.5612  | -0.0827 | C |
| 10 | C10 | 1.9663  | 1.8728  | 0.0245  | C |
| 11 | C11 | 3.3377  | 2.0528  | 0.2820  | C |
| 12 | C12 | 4.1799  | 0.9564  | 0.3870  | C |
| 13 | H13 | 4.3419  | -1.2055 | 0.2805  | H |
| 14 | H14 | 0.0016  | -3.1376 | -0.3807 | H |
| 15 | H15 | 3.7135  | 3.0663  | 0.3777  | H |
| 16 | H16 | 5.2380  | 1.1111  | 0.5756  | H |
| 17 | O17 | -0.2408 | -1.6034 | 1.0979  | O |
| 18 | C18 | -2.0403 | -1.2095 | -0.6096 | C |
| 19 | C19 | -3.0435 | -0.6711 | 0.3814  | C |
| 20 | C20 | -4.0416 | 0.1984  | 0.1624  | C |
| 21 | C21 | -4.9782 | 0.5858  | 1.2830  | C |
| 22 | H22 | -2.1914 | -2.2916 | -0.7216 | H |
| 23 | H23 | -2.1612 | -0.7677 | -1.6017 | H |
| 24 | H24 | -2.9343 | -1.0795 | 1.3862  | H |
| 25 | H25 | -4.7261 | 0.0810  | 2.2209  | H |
| 26 | H26 | -6.0186 | 0.3383  | 1.0300  | H |
| 27 | H27 | -4.9525 | 1.6702  | 1.4592  | H |
| 28 | C28 | -4.3386 | 0.8639  | -1.1584 | C |
| 29 | H29 | -4.3250 | 1.9565  | -1.0456 | H |
| 30 | H30 | -5.3475 | 0.6010  | -1.5049 | H |
| 31 | H31 | -3.6314 | 0.6015  | -1.9480 | H |
| 32 | O32 | 1.2082  | 2.9730  | -0.1082 | O |
| 33 | H33 | 0.2958  | 2.6685  | -0.3481 | H |

Conformer **2b**

|   |    |        |        |         |   |
|---|----|--------|--------|---------|---|
| 1 | C1 | 3.3744 | 0.5921 | 0.7424  | C |
| 2 | C2 | 2.0623 | 0.6522 | 0.2898  | C |
| 3 | C3 | 1.3697 | 1.9704 | 0.2833  | C |
| 4 | O4 | 1.8051 | 2.9507 | 0.8717  | O |
| 5 | C5 | 0.0834 | 2.0676 | -0.4843 | C |

|        |         |         |           |
|--------|---------|---------|-----------|
| 6 C6   | -0.6539 | 0.8446  | -0.8813 C |
| 7 C7   | -0.0066 | -0.4953 | -0.5954 C |
| 8 O8   | -0.6445 | -1.5294 | -0.8411 O |
| 9 C9   | 1.3775  | -0.5281 | -0.1124 C |
| 10 C10 | 2.0568  | -1.7713 | -0.0249 C |
| 11 C11 | 3.3918  | -1.8097 | 0.4183 C  |
| 12 C12 | 4.0379  | -0.6420 | 0.7931 C  |
| 13 H13 | 3.8674  | 1.5061  | 1.0536 H  |
| 14 H14 | -0.4665 | 2.9963  | -0.3431 H |
| 15 H15 | 3.8894  | -2.7728 | 0.4660 H  |
| 16 H16 | 5.0662  | -0.6870 | 1.1389 H  |
| 17 O17 | 0.1378  | 1.5854  | -1.8380 O |
| 18 C18 | -2.1609 | 0.8733  | -1.0629 C |
| 19 C19 | -2.8926 | 0.7304  | 0.2494 C  |
| 20 C20 | -3.7316 | -0.2467 | 0.6289 C  |
| 21 C21 | -4.3950 | -0.2004 | 1.9855 C  |
| 22 H22 | -2.4401 | 0.0953  | -1.7771 H |
| 23 H23 | -2.4031 | 1.8400  | -1.5233 H |
| 24 H24 | -2.7066 | 1.5399  | 0.9565 H  |
| 25 H25 | -4.1391 | -1.0901 | 2.5774 H  |
| 26 H26 | -5.4894 | -0.1990 | 1.8867 H  |
| 27 H27 | -4.1030 | 0.6865  | 2.5564 H  |
| 28 C28 | -4.1066 | -1.4431 | -0.2100 C |
| 29 H29 | -3.5575 | -1.5025 | -1.1510 H |
| 30 H30 | -3.9175 | -2.3706 | 0.3469 H  |
| 31 H31 | -5.1816 | -1.4317 | -0.4367 H |
| 32 O32 | 1.4769  | -2.9368 | -0.3508 O |
| 33 H33 | 0.5395  | -2.7334 | -0.6037 H |

### Conformer 2c

|        |         |         |           |
|--------|---------|---------|-----------|
| 1 C1   | -3.0896 | 1.6946  | 0.2481 C  |
| 2 C2   | -1.8849 | 1.0489  | -0.0002 C |
| 3 C3   | -0.6677 | 1.8715  | -0.2437 C |
| 4 O4   | -0.7159 | 3.0704  | -0.4830 O |
| 5 C5   | 0.6585  | 1.1715  | -0.1823 C |
| 6 C6   | 0.7390  | -0.3067 | -0.2752 C |
| 7 C7   | -0.5650 | -1.0766 | -0.3370 C |
| 8 O8   | -0.5260 | -2.2966 | -0.5546 O |
| 9 C9   | -1.8233 | -0.3698 | -0.0774 C |
| 10 C10 | -3.0222 | -1.1125 | 0.0799 C  |
| 11 C11 | -4.2286 | -0.4424 | 0.3544 C  |
| 12 C12 | -4.2565 | 0.9411  | 0.4391 C  |
| 13 H13 | -3.1096 | 2.7778  | 0.2877 H  |
| 14 H14 | 1.5146  | 1.7665  | -0.4905 H |

|        |         |         |           |
|--------|---------|---------|-----------|
| 15 H15 | -5.1280 | -1.0357 | 0.4832 H  |
| 16 H16 | -5.1961 | 1.4455  | 0.6437 H  |
| 17 O17 | 0.8661  | 0.3697  | 0.9928 O  |
| 18 C18 | 1.9712  | -1.0313 | -0.8043 C |
| 19 C19 | 3.2286  | -0.1999 | -0.8393 C |
| 20 C20 | 4.1812  | -0.1310 | 0.1050 C  |
| 21 C21 | 5.3970  | 0.7432  | -0.0901 C |
| 22 H22 | 1.7303  | -1.3765 | -1.8170 H |
| 23 H23 | 2.0964  | -1.9355 | -0.2006 H |
| 24 H24 | 3.3607  | 0.4026  | -1.7380 H |
| 25 H25 | 5.3734  | 1.2708  | -1.0487 H |
| 26 H26 | 6.3189  | 0.1468  | -0.0488 H |
| 27 H27 | 5.4756  | 1.4904  | 0.7115 H  |
| 28 C28 | 4.1518  | -0.8874 | 1.4098 C  |
| 29 H29 | 3.2715  | -1.5235 | 1.5227 H  |
| 30 H30 | 5.0471  | -1.5158 | 1.5111 H  |
| 31 H31 | 4.1672  | -0.1869 | 2.2556 H  |
| 32 O32 | -3.0630 | -2.4503 | -0.0215 O |
| 33 H33 | -2.1492 | -2.7512 | -0.2619 H |

#### Conformer 2d

|        |         |         |           |
|--------|---------|---------|-----------|
| 1 C1   | -3.0672 | 1.4300  | -0.6838 C |
| 2 C2   | -1.8385 | 0.9742  | -0.2233 C |
| 3 C3   | -0.7229 | 1.9499  | -0.0771 C |
| 4 O4   | -0.7537 | 3.0699  | -0.5681 O |
| 5 C5   | 0.4753  | 1.5088  | 0.7126 C  |
| 6 C6   | 0.7100  | 0.0728  | 0.9895 C  |
| 7 C7   | -0.3471 | -0.9142 | 0.5388 C  |
| 8 O8   | -0.1134 | -2.1272 | 0.6491 O  |
| 9 C9   | -1.6322 | -0.4064 | 0.0508 C  |
| 10 C10 | -2.6999 | -1.3128 | -0.1783 C |
| 11 C11 | -3.9438 | -0.8293 | -0.6244 C |
| 12 C12 | -4.1210 | 0.5235  | -0.8693 C |
| 13 H13 | -3.1925 | 2.4855  | -0.8971 H |
| 14 H14 | 1.3244  | 2.1887  | 0.6800 H  |
| 15 H15 | -4.7464 | -1.5429 | -0.7800 H |
| 16 H16 | -5.0842 | 0.8818  | -1.2198 H |
| 17 O17 | 0.1778  | 0.9521  | 2.0059 O  |
| 18 C18 | 2.1158  | -0.4576 | 1.2200 C  |
| 19 C19 | 2.7926  | -0.8874 | -0.0589 C |
| 20 C20 | 3.8780  | -0.3488 | -0.6378 C |
| 21 C21 | 4.6556  | 0.8311  | -0.1085 C |
| 22 H22 | 2.0365  | -1.3134 | 1.9024 H  |
| 23 H23 | 2.6750  | 0.3224  | 1.7425 H  |

|        |         |         |         |   |
|--------|---------|---------|---------|---|
| 24 H24 | 2.3305  | -1.7439 | -0.5482 | H |
| 25 H25 | 4.2632  | 1.2318  | 0.8288  | H |
| 26 H26 | 4.6636  | 1.6456  | -0.8455 | H |
| 27 H27 | 5.7058  | 0.5545  | 0.0570  | H |
| 28 C28 | 4.4245  | -0.9281 | -1.9218 | C |
| 29 H29 | 5.4615  | -1.2666 | -1.7895 | H |
| 30 H30 | 3.8304  | -1.7769 | -2.2745 | H |
| 31 H31 | 4.4456  | -0.1696 | -2.7165 | H |
| 32 O32 | -2.5793 | -2.6355 | 0.0140  | O |
| 33 H33 | -1.6398 | -2.8057 | 0.2818  | H |

Conformer 2e

|        |         |         |         |   |
|--------|---------|---------|---------|---|
| 1 C1   | 3.0686  | 1.7555  | -0.1513 | C |
| 2 C2   | 1.8705  | 1.0559  | -0.0815 | C |
| 3 C3   | 0.5919  | 1.8183  | -0.1191 | C |
| 4 O4   | 0.5310  | 2.9929  | -0.4559 | O |
| 5 C5   | -0.6556 | 1.0869  | 0.2815  | C |
| 6 C6   | -0.6828 | -0.3941 | 0.3322  | C |
| 7 C7   | 0.6110  | -1.1289 | 0.0446  | C |
| 8 O8   | 0.5835  | -2.3633 | -0.0677 | O |
| 9 C9   | 1.8606  | -0.3655 | -0.0335 | C |
| 10 C10 | 3.0991  | -1.0566 | -0.0848 | C |
| 11 C11 | 4.3033  | -0.3303 | -0.1313 | C |
| 12 C12 | 4.2835  | 1.0556  | -0.1610 | C |
| 13 H13 | 3.0457  | 2.8382  | -0.2006 | H |
| 14 H14 | -1.5878 | 1.6211  | 0.1133  | H |
| 15 H15 | 5.2363  | -0.8839 | -0.1565 | H |
| 16 H16 | 5.2203  | 1.6028  | -0.2048 | H |
| 17 O17 | -0.5683 | 0.3900  | 1.5388  | O |
| 18 C18 | -1.9677 | -1.1854 | 0.1287  | C |
| 19 C19 | -3.2086 | -0.4642 | 0.5824  | C |
| 20 C20 | -4.2796 | -0.1229 | -0.1530 | C |
| 21 C21 | -5.4577 | 0.5715  | 0.4895  | C |
| 22 H22 | -2.0157 | -1.4683 | -0.9273 | H |
| 23 H23 | -1.8552 | -2.1229 | 0.6890  | H |
| 24 H24 | -3.2223 | -0.2153 | 1.6428  | H |
| 25 H25 | -5.2962 | 0.7502  | 1.5570  | H |
| 26 H26 | -5.6559 | 1.5375  | 0.0051  | H |
| 27 H27 | -6.3736 | -0.0251 | 0.3764  | H |
| 28 C28 | -4.4423 | -0.3857 | -1.6302 | C |
| 29 H29 | -3.5777 | -0.8718 | -2.0876 | H |
| 30 H30 | -4.6237 | 0.5548  | -2.1675 | H |
| 31 H31 | -5.3208 | -1.0198 | -1.8120 | H |
| 32 O32 | 3.1801  | -2.3964 | -0.0906 | O |

33 H33 2.2512 -2.7430 -0.1023 H

Conformer **2f**

|        |         |         |           |
|--------|---------|---------|-----------|
| 1 C1   | 3.4517  | 0.9941  | 0.5263 C  |
| 2 C2   | 2.1415  | 0.8203  | 0.0981 C  |
| 3 C3   | 1.3189  | 2.0247  | -0.2004 C |
| 4 O4   | 1.8002  | 3.1412  | -0.3353 O |
| 5 C5   | -0.1631 | 1.8246  | -0.3283 C |
| 6 C6   | -0.7366 | 0.4686  | -0.5345 C |
| 7 C7   | 0.2328  | -0.6944 | -0.5667 C |
| 8 O8   | -0.1734 | -1.8047 | -0.9398 O |
| 9 C9   | 1.6129  | -0.4824 | -0.1162 C |
| 10 C10 | 2.4617  | -1.6018 | 0.0847 C  |
| 11 C11 | 3.7768  | -1.4076 | 0.5458 C  |
| 12 C12 | 4.2595  | -0.1266 | 0.7651 C  |
| 13 H13 | 3.8327  | 1.9994  | 0.6659 H  |
| 14 H14 | -0.7182 | 2.6921  | -0.6798 H |
| 15 H15 | 4.3988  | -2.2821 | 0.7070 H  |
| 16 H16 | 5.2797  | 0.0083  | 1.1115 H  |
| 17 O17 | -0.7638 | 1.1031  | 0.7592 O  |
| 18 C18 | -2.0855 | 0.2895  | -1.2194 C |
| 19 C19 | -3.0144 | -0.6532 | -0.4900 C |
| 20 C20 | -4.0474 | -0.3220 | 0.3010 C  |
| 21 C21 | -4.8912 | -1.3965 | 0.9464 C  |
| 22 H22 | -2.5336 | 1.2803  | -1.3314 H |
| 23 H23 | -1.8943 | -0.0884 | -2.2314 H |
| 24 H24 | -2.7971 | -1.7095 | -0.6325 H |
| 25 H25 | -4.5473 | -2.4014 | 0.6824 H  |
| 26 H26 | -4.8746 | -1.3048 | 2.0413 H  |
| 27 H27 | -5.9438 | -1.3040 | 0.6443 H  |
| 28 C28 | -4.4755 | 1.0876  | 0.6285 C  |
| 29 H29 | -5.5135 | 1.2594  | 0.3123 H  |
| 30 H30 | -4.4530 | 1.2484  | 1.7149 H  |
| 31 H31 | -3.8480 | 1.8538  | 0.1684 H  |
| 32 O32 | 2.0637  | -2.8628 | -0.1462 O |
| 33 H33 | 1.1464  | -2.8141 | -0.5184 H |



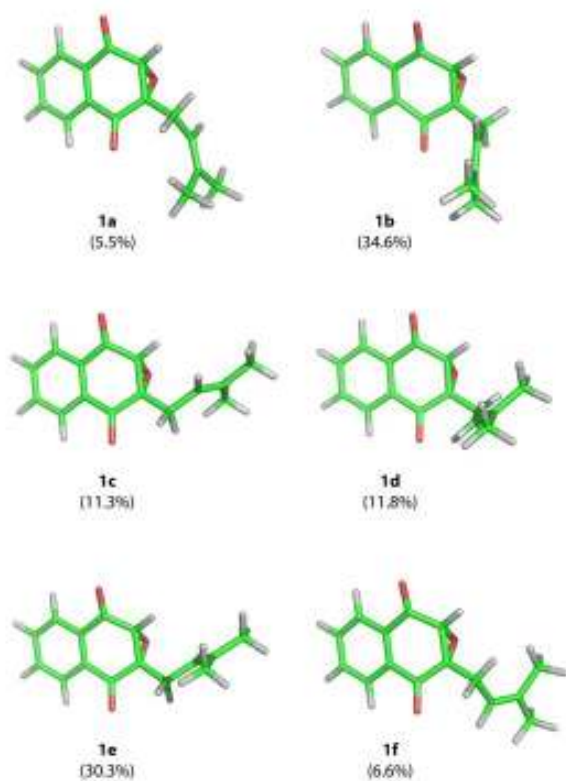

**Figure S3.** Six energy lowest conformers of (2*S*,3*R*)-epoxy-2,3-dihydrolapachol (**1**). Population of each conformer was calculated using the Gibbs free energy.

**Table S4.** Excited energy, wavelength, oscillator strength, rotatory strength in velocity form and rotatory strength in length form of **1a-1f**.<sup>a</sup>

| Conformer | $\Delta E$ (eV) | $\lambda$ (nm) | f      | $R^{vel,b}$ | $R^{len,b}$ |
|-----------|-----------------|----------------|--------|-------------|-------------|
| <b>1a</b> | 3.09            | 400.8          | 0.001  | -5.7        | -7.8        |
|           | 3.47            | 357.5          | 0.002  | -24.3       | -22.7       |
|           | 3.65            | 339.6          | 0.007  | 33.8        | 33.3        |
|           | 4.18            | 296.5          | 0.022  | -3.6        | -4.0        |
|           | 4.25            | 292.0          | 0.047  | -3.1        | -5.2        |
|           | 4.38            | 283.0          | 0.058  | 9.2         | 10.0        |
|           | 4.76            | 260.3          | 0.008  | 0.6         | -1.3        |
|           | 4.85            | 255.6          | 0.007  | 1.1         | 4.1         |
|           | 5.21            | 237.9          | 0.082  | -0.2        | -0.1        |
|           | 5.41            | 229.3          | 0.064  | 7.6         | 7.0         |
|           | 5.44            | 227.8          | 0.042  | 10.4        | 11.3        |
|           | 5.49            | 225.6          | 0.480  | 5.7         | 3.6         |
|           | 5.91            | 209.9          | 0.051  | -16.9       | -18.1       |
|           | 6.05            | 205.0          | 0.007  | 2.7         | 2.5         |
|           | 6.08            | 203.9          | 0.024  | -3.9        | -3.9        |
| 6.14      | 201.8           | 0.012          | 7.0    | 6.8         |             |
| <b>1b</b> | 3.16            | 392.7          | 0.0003 | 4.9         | 3.9         |
|           | 3.44            | 359.9          | 0.001  | -23.3       | -21.0       |
|           | 3.61            | 343.9          | 0.002  | 15.2        | 15.1        |
|           | 4.20            | 295.5          | 0.063  | -2.5        | -2.4        |
|           | 4.27            | 290.3          | 0.010  | 12.5        | 11.5        |
|           | 4.36            | 284.5          | 0.060  | -4.4        | -4.4        |
|           | 4.71            | 263.4          | 0.004  | -1.3        | -2.7        |
|           | 4.84            | 256.2          | 0.013  | 1.0         | 3.3         |
|           | 5.17            | 240.0          | 0.073  | -3.9        | -4.0        |
|           | 5.38            | 230.3          | 0.044  | -0.5        | -1.1        |
|           | 5.45            | 227.5          | 0.080  | 19.6        | 19.2        |
|           | 5.48            | 226.1          | 0.482  | -3.5        | -4.6        |
|           | 6.00            | 206.8          | 0.015  | 10.2        | 10.1        |
|           | 6.05            | 204.9          | 0.049  | 8.1         | 8.9         |
|           | 6.09            | 203.8          | 0.009  | -12.0       | -12.1       |
| 6.15      | 201.6           | 0.002          | 2.5    | 2.6         |             |
| <b>1c</b> | 3.22            | 385.5          | 0.001  | 3.1         | 1.7         |
|           | 3.44            | 360.3          | 0.001  | -22.1       | -19.8       |
|           | 3.66            | 339.0          | 0.005  | 20.6        | 20.0        |
|           | 4.20            | 295.0          | 0.064  | -4.2        | -4.2        |
|           | 4.33            | 286.2          | 0.016  | -2.7        | -5.9        |

|           |      |       |        |       |       |
|-----------|------|-------|--------|-------|-------|
|           | 4.37 | 283.6 | 0.046  | 9.5   | 12.1  |
|           | 4.71 | 263.4 | 0.004  | -0.5  | -2.4  |
|           | 4.85 | 255.5 | 0.016  | 2.7   | 6.1   |
|           | 5.18 | 239.5 | 0.064  | -0.8  | -0.8  |
|           | 5.40 | 229.6 | 0.046  | 3.2   | 2.9   |
|           | 5.46 | 227.0 | 0.074  | 19.6  | 20.4  |
|           | 5.49 | 225.7 | 0.525  | -23.1 | -24.2 |
|           | 5.98 | 207.3 | 0.009  | 11.5  | 11.5  |
|           | 6.10 | 203.1 | 0.014  | -4.8  | -4.4  |
|           | 6.14 | 201.8 | 0.004  | -0.4  | -0.3  |
|           | 6.18 | 200.5 | 0.0004 | 3.6   | 3.8   |
| <b>1d</b> | 3.19 | 388.6 | 0.0001 | 1.0   | 0.02  |
|           | 3.44 | 360.4 | 0.001  | -22.0 | -19.7 |
|           | 3.59 | 345.8 | 0.003  | 16.3  | 16.3  |
|           | 4.19 | 296.0 | 0.056  | -2.5  | -2.4  |
|           | 4.30 | 288.6 | 0.034  | 23.8  | 23.2  |
|           | 4.36 | 284.1 | 0.063  | -10.6 | -10.2 |
|           | 4.69 | 264.2 | 0.005  | 0.1   | -1.4  |
|           | 4.83 | 256.4 | 0.007  | -3.4  | -0.5  |
|           | 5.17 | 240.0 | 0.046  | -2.9  | -3.0  |
|           | 5.38 | 230.6 | 0.046  | -0.9  | -1.7  |
|           | 5.47 | 226.8 | 0.198  | 77.1  | 77.5  |
|           | 5.48 | 226.1 | 0.402  | -26.9 | -26.3 |
|           | 5.95 | 208.5 | 0.008  | -0.5  | -0.7  |
|           | 6.08 | 203.9 | 0.024  | 2.1   | 2.5   |
|           | 6.09 | 203.6 | 0.007  | -2.0  | -1.3  |
|           | 6.17 | 201.0 | 0.003  | 3.7   | 3.7   |
| <b>1e</b> | 3.22 | 385.3 | 0.001  | 2.2   | 0.6   |
|           | 3.45 | 359.9 | 0.001  | -22.5 | -20.1 |
|           | 3.65 | 339.8 | 0.006  | 20.8  | 20.6  |
|           | 4.20 | 295.2 | 0.064  | -3.5  | -3.4  |
|           | 4.33 | 286.2 | 0.014  | -4.3  | -7.3  |
|           | 4.38 | 283.2 | 0.055  | 6.1   | 8.1   |
|           | 4.71 | 263.3 | 0.004  | -0.2  | -1.8  |
|           | 4.85 | 255.8 | 0.013  | 2.1   | 5.3   |
|           | 5.18 | 239.6 | 0.055  | -3.1  | -3.3  |
|           | 5.40 | 229.8 | 0.034  | -0.5  | -0.8  |
|           | 5.49 | 225.8 | 0.548  | 9.3   | 9.5   |
|           | 5.54 | 223.6 | 0.078  | -3.0  | -3.4  |
|           | 5.89 | 210.3 | 0.003  | -3.2  | -3.5  |
|           | 6.09 | 203.7 | 0.017  | 2.0   | 2.6   |

|           |      |       |       |       |       |
|-----------|------|-------|-------|-------|-------|
|           | 6.14 | 201.8 | 0.004 | -4.1  | -4.2  |
|           | 6.18 | 200.6 | 0.002 | 8.1   | 8.5   |
| <b>1f</b> | 3.16 | 392.4 | 0.002 | -8.5  | -10.1 |
|           | 3.45 | 359.1 | 0.003 | -20.1 | -18.6 |
|           | 3.60 | 344.8 | 0.008 | 27.3  | 25.9  |
|           | 4.20 | 295.2 | 0.051 | -3.6  | -3.6  |
|           | 4.28 | 290.0 | 0.023 | -14.0 | -16.6 |
|           | 4.38 | 283.2 | 0.061 | 15.2  | 16.8  |
|           | 4.75 | 261.2 | 0.012 | -1.0  | -3.2  |
|           | 4.80 | 258.3 | 0.003 | -0.4  | 2.5   |
|           | 5.19 | 238.8 | 0.087 | 6.0   | 6.7   |
|           | 5.40 | 229.5 | 0.055 | 9.8   | 9.2   |
|           | 5.44 | 228.0 | 0.040 | 3.0   | 3.9   |
|           | 5.49 | 225.8 | 0.496 | -46.6 | -49.7 |
|           | 5.99 | 206.9 | 0.036 | -7.2  | -7.8  |
|           | 6.07 | 204.1 | 0.021 | 0.6   | 0.4   |
|           | 6.10 | 203.3 | 0.010 | -9.4  | -10.2 |
|           | 6.15 | 201.8 | 0.009 | 19.7  | 20.3  |

<sup>a</sup> All calculations were performed at the B3LYP/6-31G(d) level using the IEFPCM solvent continuum model with methanol as the solvent. <sup>b</sup> 10<sup>-40</sup> cgs.

**Table S5.** Conformational analysis of **1** using the IEFPCM solvent continuum model (methanol)

| Conformer | $\Delta E^a$ | $P_{Eb}(\%)^b$ | $\Delta E_0^a$ | $P_{E0}(\%)^b$ | $\Delta G^a$ | $P_G(\%)^b$ |
|-----------|--------------|----------------|----------------|----------------|--------------|-------------|
| <b>1a</b> | 0.84         | 7.0            | 0.85           | 6.9            | 1.09         | 5.5         |
| <b>1b</b> | 0.15         | 23.0           | 0.18           | 21.3           | 0            | 34.6        |
| <b>1c</b> | 0.45         | 13.8           | 0.44           | 13.8           | 0.66         | 11.3        |
| <b>1d</b> | 0.29         | 18.0           | 0.23           | 19.8           | 0.4          | 11.8        |
| <b>1e</b> | 0            | 29.6           | 0              | 29.1           | 0.08         | 30.3        |
| <b>1f</b> | 0.73         | 8.6            | 0.69           | 9.0            | 0.98         | 6.6         |

<sup>a</sup> Relative energy, relative zero point energy, and relative Gibbs free energy at the B3LYP/6-31G(d) level, respectively (kcal/mol). <sup>b</sup> Conformational distribution calculated by using the respective parameters above at the B3LYP/6-31G(d) level.

**Table S6.** Important dihedral angles (deg) of optimized predominant conformers **1a-1f** with DFT at the B3LYP/6-31G(d) using the IEFPCM solvent continuum model with methanol as the solvent.

|                | <b>1a</b> | <b>1b</b> | <b>1c</b> | <b>1d</b> | <b>1e</b> | <b>1f</b> |
|----------------|-----------|-----------|-----------|-----------|-----------|-----------|
| C3-C2-C1'-C2'  | 129       | -81       | 17        | -88       | 30        | 135       |
| C2-C1'-C2'-C3' | 125       | -118      | 93        | 116       | -120      | -102      |

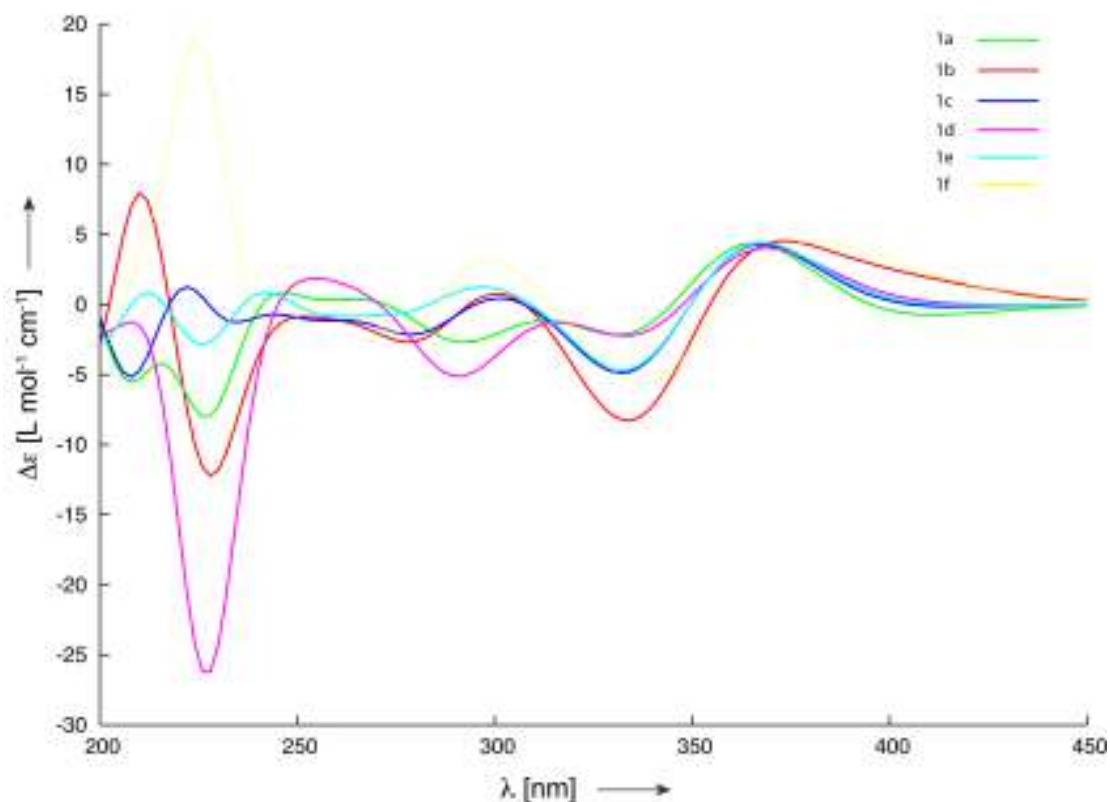

**Figure S4.** Comparison of the computed ECD spectra for the six energy lowest conformers of **1** with a *2S,3R* configuration. The calculations were performed with DFT at the B3LYP/6-31G(d) level using the IEFPCM solvent continuum model with methanol as the solvent.

**Table S7.** Calculated ORD values for the six energy lowest conformers of (2*S*,3*R*)-**1** at different wavelengths.

| Conformation           | Population | [ $\alpha$ ]               |                            |                            |
|------------------------|------------|----------------------------|----------------------------|----------------------------|
|                        |            | $\lambda = 546 \text{ nm}$ | $\lambda = 578 \text{ nm}$ | $\lambda = 589 \text{ nm}$ |
| <b>1a</b>              | 5.5        | -190.5                     | -191.5                     | -185.4                     |
| <b>1b</b>              | 34.6       | 109.1                      | 114.5                      | 130.6                      |
| <b>1c</b>              | 11.3       | -118.1                     | -122.3                     | -133.0                     |
| <b>1d</b>              | 11.8       | -319.6                     | -333.0                     | -370.3                     |
| <b>1e</b>              | 30.3       | 60.1                       | 66.2                       | 86.9                       |
| <b>1f</b>              | 6.6        | 293.9                      | 318.1                      | 399.4                      |
| Conformational average |            | +13.8                      | +17.0                      | +28.9                      |
| Experimental           |            | -3.0                       | -11.3                      | -9.0                       |

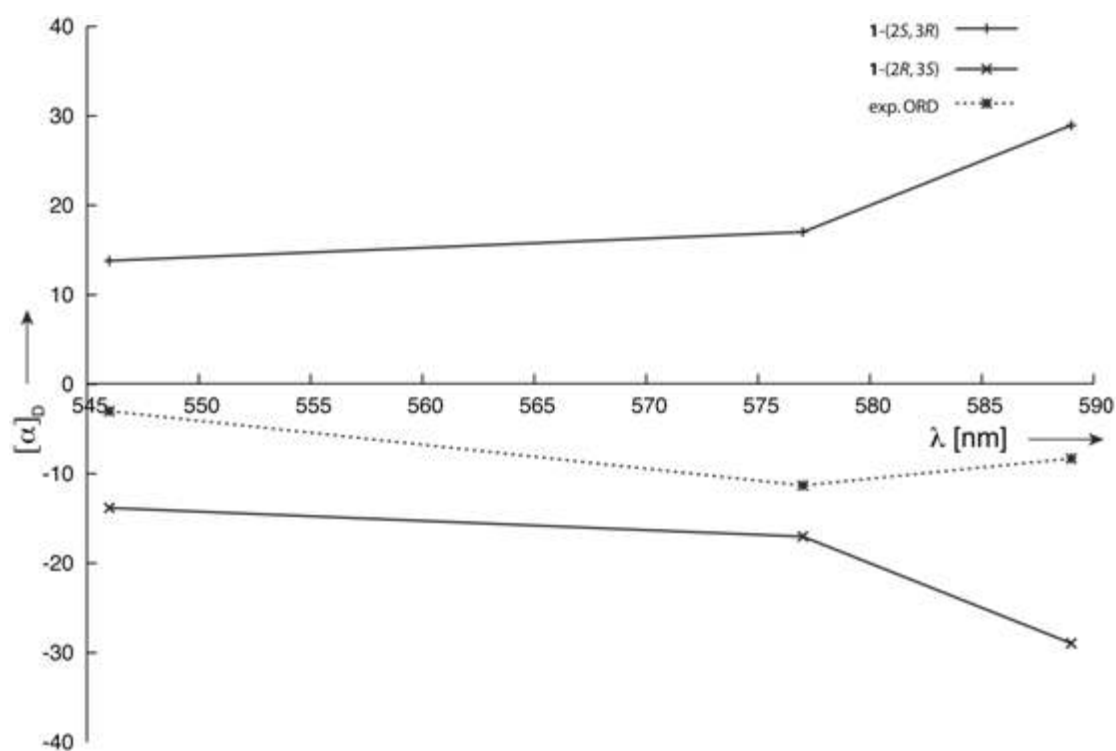

**Figure S5.** Comparison of experimental ORD values with those calculated for the two possible enantiomers (2*S*,3*R* and 2*R*,3*S*) of **1**. The calculations were performed with DFT at the B3LYP/6-31G(d) using the IEFPCM solvent continuum model with methanol as the solvent. The calculated ORD values are weighted based on the Gibbs free energy.

Coordinate of conformers **1a-1f**:

Conformer **1a**:

|        |         |         |           |
|--------|---------|---------|-----------|
| 1 C1   | -3.7542 | -0.0223 | -0.2017 C |
| 2 C2   | -2.4006 | 0.2634  | 0.0068 C  |
| 3 C3   | -1.9686 | 1.6746  | 0.1859 C  |
| 4 O4   | -2.7453 | 2.5852  | 0.4392 O  |
| 5 C5   | -0.5018 | 1.9559  | 0.0177 C  |
| 6 C6   | 0.5058  | 0.8632  | 0.1255 C  |
| 7 C7   | -0.0256 | -0.5309 | 0.3987 C  |
| 8 O8   | 0.7059  | -1.4000 | 0.8493 O  |
| 9 C9   | -1.4655 | -0.7903 | 0.0996 C  |
| 10 C10 | -3.2513 | -2.3882 | -0.2504 C |
| 11 C11 | -4.1772 | -1.3426 | -0.3412 C |
| 12 H12 | -4.4607 | 0.7998  | -0.2525 H |
| 13 H13 | -0.1971 | 2.9770  | 0.2395 H  |
| 14 H14 | -3.5826 | -3.4171 | -0.3541 H |
| 15 H15 | -5.2268 | -1.5597 | -0.5147 H |
| 16 O16 | 0.0814  | 1.3722  | -1.1562 O |
| 17 C17 | 1.9441  | 1.1644  | 0.5145 C  |
| 18 C18 | 2.9411  | 0.5595  | -0.4438 C |
| 19 C19 | 3.9673  | -0.2597 | -0.1679 C |
| 20 C20 | 4.8874  | -0.7316 | -1.2696 C |
| 21 H21 | 2.0601  | 2.2565  | 0.5146 H  |
| 22 H22 | 2.1000  | 0.8260  | 1.5417 H  |
| 23 H23 | 2.7979  | 0.8650  | -1.4806 H |
| 24 H24 | 4.5992  | -0.3284 | -2.2455 H |
| 25 H25 | 5.9262  | -0.4338 | -1.0696 H |
| 26 H26 | 4.8880  | -1.8284 | -1.3379 H |
| 27 C27 | 4.3149  | -0.7838 | 1.2032 C  |
| 28 H28 | 4.3322  | -1.8822 | 1.1979 H  |
| 29 H29 | 5.3231  | -0.4598 | 1.4959 H  |
| 30 H30 | 3.6181  | -0.4653 | 1.9812 H  |
| 31 C31 | -1.9046 | -2.1136 | -0.0187 C |
| 32 H32 | -1.1801 | -2.9158 | 0.0741 H  |

Conformer **1b**:

|      |         |        |           |
|------|---------|--------|-----------|
| 1 C1 | 3.4976  | 0.2346 | -0.7151 C |
| 2 C2 | 2.1748  | 0.3643 | -0.2780 C |
| 3 C3 | 1.5176  | 1.6966 | -0.3385 C |
| 4 O4 | 1.9697  | 2.6339 | -0.9822 O |
| 5 C5 | 0.2463  | 1.8633 | 0.4440 C  |
| 6 C6 | -0.5390 | 0.6800 | 0.8789 C  |

|        |         |         |           |
|--------|---------|---------|-----------|
| 7 C7   | 0.0412  | -0.6949 | 0.6010 C  |
| 8 O8   | -0.6376 | -1.6965 | 0.7752 O  |
| 9 C9   | 1.4685  | -0.7731 | 0.1723 C  |
| 10 C10 | 3.4271  | -2.1371 | -0.2450 C |
| 11 C11 | 4.1249  | -1.0093 | -0.6914 C |
| 12 H12 | 4.0193  | 1.1176  | -1.0691 H |
| 13 H13 | -0.2664 | 2.8112  | 0.2899 H  |
| 14 H14 | 3.9150  | -3.1071 | -0.2307 H |
| 15 H15 | 5.1544  | -1.1031 | -1.0235 H |
| 16 O16 | 0.3001  | 1.4066  | 1.8053 O  |
| 17 C17 | -2.0401 | 0.7836  | 1.0822 C  |
| 18 C18 | -2.7999 | 0.6781  | -0.2176 C |
| 19 C19 | -3.6962 | -0.2526 | -0.5819 C |
| 20 C20 | -4.3789 | -0.1713 | -1.9273 C |
| 21 H21 | -2.3462 | 0.0192  | 1.8001 H  |
| 22 H22 | -2.2285 | 1.7607  | 1.5463 H  |
| 23 H23 | -2.5838 | 1.4767  | -0.9288 H |
| 24 H24 | -4.1791 | -1.0728 | -2.5230 H |
| 25 H25 | -5.4700 | -0.1132 | -1.8109 H |
| 26 H26 | -4.0504 | 0.6995  | -2.5033 H |
| 27 C27 | -4.1200 | -1.4275 | 0.2642 C  |
| 28 H28 | -3.5538 | -1.5199 | 1.1923 H  |
| 29 H29 | -3.9963 | -2.3631 | -0.2976 H |
| 30 H30 | -5.1873 | -1.3559 | 0.5152 H  |
| 31 C31 | 2.1040  | -2.0202 | 0.1765 C  |
| 32 H32 | 1.5466  | -2.8885 | 0.5114 H  |

Conformer 1c:

|        |         |         |           |
|--------|---------|---------|-----------|
| 1 C1   | -3.3809 | 1.2908  | -0.2578 C |
| 2 C2   | -2.1225 | 0.7413  | 0.0097 C  |
| 3 C3   | -0.9731 | 1.6453  | 0.2804 C  |
| 4 O4   | -1.1076 | 2.8320  | 0.5468 O  |
| 5 C5   | 0.3997  | 1.0404  | 0.2007 C  |
| 6 C6   | 0.5899  | -0.4304 | 0.3004 C  |
| 7 C7   | -0.6570 | -1.2888 | 0.4103 C  |
| 8 O8   | -0.5684 | -2.4620 | 0.7436 O  |
| 9 C9   | -1.9665 | -0.6611 | 0.0679 C  |
| 10 C10 | -4.3216 | -0.9315 | -0.4300 C |
| 11 C11 | -4.4748 | 0.4584  | -0.4864 C |
| 12 H12 | -3.4848 | 2.3706  | -0.2835 H |
| 13 H13 | 1.2158  | 1.6968  | 0.4928 H  |
| 14 H14 | -5.1754 | -1.5795 | -0.6037 H |
| 15 H15 | -5.4474 | 0.8896  | -0.7035 H |
| 16 O16 | 0.6442  | 0.2467  | -0.9714 O |



|        |         |         |           |
|--------|---------|---------|-----------|
| 17 C17 | 1.8811  | -1.0566 | 0.8129 C  |
| 18 C18 | 3.0760  | -0.1371 | 0.8210 C  |
| 19 C19 | 3.9999  | 0.0011  | -0.1439 C |
| 20 C20 | 5.1513  | 0.9637  | 0.0237 C  |
| 21 H21 | 1.6821  | -1.4109 | 1.8313 H  |
| 22 H22 | 2.0617  | -1.9550 | 0.2137 H  |
| 23 H23 | 3.1831  | 0.4751  | 1.7166 H  |
| 24 H24 | 5.1085  | 1.4914  | 0.9816 H  |
| 25 H25 | 6.1142  | 0.4376  | -0.0360 H |
| 26 H26 | 5.1571  | 1.7119  | -0.7808 H |
| 27 C27 | 3.9981  | -0.7584 | -1.4474 C |
| 28 H28 | 3.1645  | -1.4575 | -1.5405 H |
| 29 H29 | 4.9347  | -1.3197 | -1.5675 H |
| 30 H30 | 3.9440  | -0.0609 | -2.2940 H |
| 31 C31 | -3.0759 | -1.4874 | -0.1445 C |
| 32 H32 | -2.9462 | -2.5625 | -0.0808 H |

**Conformer 1d:**

|        |         |         |           |
|--------|---------|---------|-----------|
| 1 C1   | -3.3297 | 1.0351  | 0.6587 C  |
| 2 C2   | -2.0556 | 0.6613  | 0.2184 C  |
| 3 C3   | -0.9958 | 1.6972  | 0.0919 C  |
| 4 O4   | -1.0876 | 2.8089  | 0.5943 O  |
| 5 C5   | 0.2227  | 1.3262  | -0.7051 C |
| 6 C6   | 0.5556  | -0.0964 | -0.9651 C |
| 7 C7   | -0.4187 | -1.1486 | -0.4702 C |
| 8 O8   | -0.0924 | -2.3274 | -0.4516 O |
| 9 C9   | -1.7776 | -0.6965 | -0.0550 C |
| 10 C10 | -4.0550 | -1.2700 | 0.5389 C  |
| 11 C11 | -4.3287 | 0.0754  | 0.8100 C  |
| 12 H12 | -3.5210 | 2.0804  | 0.8775 H  |
| 13 H13 | 1.0243  | 2.0623  | -0.6914 H |
| 14 H14 | -4.8324 | -2.0180 | 0.6615 H  |
| 15 H15 | -5.3187 | 0.3722  | 1.1430 H  |
| 16 O16 | -0.0498 | 0.7296  | -1.9848 O |
| 17 C17 | 1.9941  | -0.5255 | -1.2044 C |
| 18 C18 | 2.7256  | -0.8453 | 0.0763 C  |
| 19 C19 | 3.7883  | -0.2115 | 0.5983 C  |
| 20 C20 | 4.4808  | 0.9829  | -0.0115 C |
| 21 H21 | 1.9680  | -1.4146 | -1.8478 H |
| 22 H22 | 2.4828  | 0.2707  | -1.7709 H |
| 23 H23 | 2.3276  | -1.7005 | 0.6206 H  |
| 24 H24 | 4.0405  | 1.3126  | -0.9553 H |
| 25 H25 | 4.4614  | 1.8327  | 0.6842 H  |
| 26 H26 | 5.5405  | 0.7586  | -0.1949 H |

|        |         |         |           |
|--------|---------|---------|-----------|
| 27 C27 | 4.3969  | -0.6872 | 1.8971 C  |
| 28 H28 | 5.4500  | -0.9683 | 1.7579 H  |
| 29 H29 | 3.8637  | -1.5507 | 2.3068 H  |
| 30 H30 | 4.3870  | 0.1120  | 2.6512 H  |
| 31 C31 | -2.7833 | -1.6542 | 0.1177 C  |
| 32 H32 | -2.5523 | -2.6955 | -0.0805 H |

Conformer **1e**:

|        |         |         |           |
|--------|---------|---------|-----------|
| 1 C1   | 3.3771  | 1.3668  | -0.1404 C |
| 2 C2   | 2.1195  | 0.7559  | -0.0912 C |
| 3 C3   | 0.8954  | 1.5984  | -0.1515 C |
| 4 O4   | 0.9097  | 2.7691  | -0.5074 O |
| 5 C5   | -0.3947 | 0.9505  | 0.2627 C  |
| 6 C6   | -0.5275 | -0.5286 | 0.2973 C  |
| 7 C7   | 0.7043  | -1.3472 | -0.0427 C |
| 8 O8   | 0.6017  | -2.5408 | -0.2879 O |
| 9 C9   | 2.0242  | -0.6520 | -0.0348 C |
| 10 C10 | 4.4416  | -0.8042 | -0.0574 C |
| 11 C11 | 4.5343  | 0.5910  | -0.1141 C |
| 12 H12 | 3.4304  | 2.4490  | -0.1983 H |
| 13 H13 | -1.2898 | 1.5507  | 0.1160 H  |
| 14 H14 | 5.3437  | -1.4083 | -0.0416 H |
| 15 H15 | 5.5083  | 1.0702  | -0.1425 H |
| 16 O16 | -0.3354 | 0.2322  | 1.5080 O  |
| 17 C17 | -1.8699 | -1.2206 | 0.1062 C  |
| 18 C18 | -3.0480 | -0.4252 | 0.6011 C  |
| 19 C19 | -4.1011 | 0.0160  | -0.1065 C |
| 20 C20 | -5.2156 | 0.7757  | 0.5745 C  |
| 21 H21 | -1.9585 | -1.4768 | -0.9537 H |
| 22 H22 | -1.8127 | -2.1766 | 0.6439 H  |
| 23 H23 | -3.0282 | -0.2071 | 1.6682 H  |
| 24 H24 | -5.0285 | 0.9066  | 1.6448 H  |
| 25 H25 | -5.3458 | 1.7693  | 0.1241 H  |
| 26 H26 | -6.1754 | 0.2539  | 0.4556 H  |
| 27 C27 | -4.3031 | -0.1897 | -1.5880 C |
| 28 H28 | -3.4822 | -0.7226 | -2.0730 H |
| 29 H29 | -4.4233 | 0.7772  | -2.0947 H |
| 30 H30 | -5.2276 | -0.7533 | -1.7741 H |
| 31 C31 | 3.1928  | -1.4222 | -0.0279 C |
| 32 H32 | 3.1059  | -2.5032 | -0.0012 H |

Conformer **1f**:

|        |         |         |           |
|--------|---------|---------|-----------|
| 1 C1   | 3.6216  | 0.5124  | 0.5450 C  |
| 2 C2   | 2.2973  | 0.4823  | 0.0952 C  |
| 3 C3   | 1.5851  | 1.7597  | -0.1727 C |
| 4 O4   | 2.1598  | 2.8330  | -0.2932 O |
| 5 C5   | 0.0874  | 1.6873  | -0.2734 C |
| 6 C6   | -0.6014 | 0.3941  | -0.5447 C |
| 7 C7   | 0.2800  | -0.8302 | -0.6979 C |
| 8 O8   | -0.1444 | -1.8365 | -1.2482 O |
| 9 C9   | 1.6660  | -0.7568 | -0.1503 C |
| 10 C10 | 3.6857  | -1.9063 | 0.5306 C  |
| 11 C11 | 4.3103  | -0.6775 | 0.7726 C  |
| 12 H12 | 4.0958  | 1.4740  | 0.7116 H  |
| 13 H13 | -0.4030 | 2.6157  | -0.5599 H |
| 14 H14 | 4.2251  | -2.8327 | 0.7037 H  |
| 15 H15 | 5.3342  | -0.6502 | 1.1329 H  |
| 16 O16 | -0.5451 | 0.9490  | 0.7830 O  |
| 17 C17 | -1.9750 | 0.3660  | -1.1992 C |
| 18 C18 | -2.9316 | -0.5948 | -0.5321 C |
| 19 C19 | -3.9263 | -0.2921 | 0.3174 C  |
| 20 C20 | -4.8028 | -1.3822 | 0.8887 C  |
| 21 H21 | -2.3679 | 1.3861  | -1.1972 H |
| 22 H22 | -1.8351 | 0.0791  | -2.2487 H |
| 23 H23 | -2.7681 | -1.6425 | -0.7761 H |
| 24 H24 | -4.5149 | -2.3731 | 0.5238 H  |
| 25 H25 | -4.7521 | -1.3925 | 1.9864 H  |
| 26 H26 | -5.8576 | -1.2147 | 0.6296 H  |
| 27 C27 | -4.2780 | 1.0994  | 0.7841 C  |
| 28 H28 | -5.3128 | 1.3488  | 0.5117 H  |
| 29 H29 | -4.2250 | 1.1571  | 1.8798 H  |
| 30 H30 | -3.6232 | 1.8745  | 0.3804 H  |
| 31 C31 | 2.3745  | -1.9452 | 0.0599 C  |
| 32 H32 | 1.8853  | -2.8905 | -0.1496 H |
